# Supplementary material
Source: PubMed Central journal article supplement (PMC8049091)
Supplement: NIHMS1681801-supplement-supplementary_material.pdf [file NIHMS1681801-supplement-supplementary_material.pdf]

1 **Supplemental Table 1.** Adjusted hazard ratio (aHR) and 95% CIs for MSS of different  
 2 racial/ethnicity groups compared to NHW in the SEER cohort and across three diagnostic year  
 3 periods for different stages – acral lentiginous melanoma only (n=3596)

|                        |          | <2000                | 2000-2009            |               | ≥2010                |               |
|------------------------|----------|----------------------|----------------------|---------------|----------------------|---------------|
|                        | Race     | aHR [95% CI] for MSS | aHR [95% CI] for MSS | P-interaction | aHR [95% CI] for MSS | P-interaction |
| <b>Localized stage</b> |          |                      |                      |               |                      |               |
|                        | Hispanic | 1.13 [0.51, 2.49]    | 1.20 [0.06, 23.3]    | 0.905         | 1.86 [0.47, 7.40]    | 0.380         |
|                        | NHB      | 0.71 [0.31, 1.65]    | 1.30 [0.81, 2.08]    | 0.273         | 2.62 [1.09, 6.27]    | 0.031         |
|                        | NHAPI    | 2.47 [1.07, 5.73]    | 1.33 [0.79, 2.23]    | 0.286         | 0.62 [0.35, 1.10]    | 0.103         |
| <b>Regional stage</b>  |          |                      |                      |               |                      |               |
|                        | Hispanic | 0.56 [0.25, 1.23]    | 1.82 [1.16, 2.86]    | 0.010         | 2.15 [1.23, 3.76]    | 0.007         |
|                        | NHB      | 0.92 [0.44, 1.95]    | 1.16 [0.64, 2.09]    | 0.621         | 2.58 [0.96, 6.93]    | 0.060         |
|                        | NHAPI    | 1.28 [0.68, 2.41]    | 1.05 [0.86, 1.29]    | 0.626         | 1.52 [0.1, 23.87]    | 0.764         |
| <b>Distant stage</b>   |          |                      |                      |               |                      |               |
|                        | Hispanic | 0.92 [0.25, 3.37]    | 1.97 [0.46, 8.46]    | 0.360         | 2.49 [0.56, 11.12]   | 0.231         |
|                        | NHB      | 0.30 [0.03, 2.92]    | 0.70 [0.26, 1.90]    | 0.490         | 1.21 [0.84, 1.75]    | 0.313         |
| <b>All stages</b>      |          |                      |                      |               |                      |               |
|                        | Hispanic | 0.75 [0.45, 1.25]    | 1.69 [1.15, 2.49]    | 0.007         | 2.36 [1.45, 3.83]    | 0.001         |
|                        | NHB      | 0.78 [0.46, 1.32]    | 1.13 [0.91, 1.41]    | 0.260         | 2.43 [1.36, 4.33]    | 0.003         |
|                        | NHAPI    | 1.38 [0.85, 2.22]    | 1.17 [0.63, 2.18]    | 0.612         | 1.32 [0.01, 436.7]   | 0.924         |
|                        | NHAIAN   | 5.50 [1.74, 17.40]   | 0.66 [0.43, 1.03]    | 0.069         | 1.92 [0.46, 7.97]    | 0.367         |

4 \*For each of the four models (localized stage, regional stage, distant stage, and all stages) for acral lentiginous  
 5 melanoma only, the adjusted HRs for MSS and P values were calculated from Cox proportional hazard models with  
 6 race, year of diagnosis and the interaction terms, adjusting for age, gender, primary site and stage. P values in 2000-  
 7 2009 showed the significance comparing the adjusted HRs to NHW for melanomas diagnosed in 2000-2009 and  
 8 those for melanomas diagnosed <2000. P values in ≥2010 showed the significance comparing the adjusted HRs to  
 9 NHW for melanomas diagnosed in ≥2010 and those for melanomas diagnosed before 2000.  
 10 SEER=Surveillance, Epidemiology, and End Results; HR=hazard ratio; CI=confidence interval. NHW=non-  
 11 Hispanic white; NHB=non-Hispanic black; NHAPI=non-Hispanic Asian or Pacific Islander; NHAIAN=non-  
 12 Hispanic American Indian/Alaska Native.

13  
14  
15  
16  
17  
18  
19  
20  
21  
22  
23  
24  
25  
26  
27  
28  
29  
30

31 **Supplemental Table 2.** Hazard ratio (HR) (top) and adjusted hazard ratio (aHR) (bottom) and  
 32 95% CIs for MSS of different racial/ethnicity groups compared to NHW in the SEER cohort and  
 33 across three diagnostic year periods for different stages – mucosal melanoma only (n=4592)

|                        |          | <2000                | 2000-2009            |                       | ≥2010                |                       |
|------------------------|----------|----------------------|----------------------|-----------------------|----------------------|-----------------------|
|                        | Race     | HR [95% CI] for MSS  | HR [95% CI] for MSS  | <i>P</i> -interaction | HR [95% CI] for MSS  | <i>P</i> -interaction |
| <b>Localized stage</b> |          |                      |                      |                       |                      |                       |
|                        | Hispanic | 0.61 [0.28, 1.29]    | 1.28 [0.97, 1.70]    | 0.085                 | 0.99 [0.96, 1.01]    | 0.319                 |
|                        | NHB      | 2.24 [1.05, 4.78]    | 2.68 [0.02, 390]     | 0.698                 | 1.31 [0.75, 2.27]    | 0.345                 |
|                        | NHAPI    | 1.49 [0.84, 2.61]    | 0.95 [0.87, 1.04]    | 0.273                 | 1.25 [0.37, 4.22]    | 0.716                 |
|                        | NHAIAN   | 2.78 [0.39, 19.87]   | 1.25 [0.58, 2.68]    | 0.572                 | 1.45 [0.30, 7.05]    | 0.647                 |
| <b>Regional stage</b>  |          |                      |                      |                       |                      |                       |
|                        | Hispanic | 0.86 [0.52, 1.42]    | 1.18 [0.85, 1.63]    | 0.330                 | 1.75 [1.02, 3.00]    | 0.043                 |
|                        | NHB      | 0.87 [0.50, 1.51]    | 0.99 [0.93, 1.06]    | 0.754                 | 1.35 [0.74, 2.46]    | 0.323                 |
|                        | NHAPI    | 1.35 [0.83, 2.21]    | 1.46 [0.06, 34.1]    | 0.816                 | 1.17 [0.51, 2.70]    | 0.708                 |
| <b>Distant stage</b>   |          |                      |                      |                       |                      |                       |
|                        | Hispanic | 2.22 [0.90, 5.50]    | 0.90 [0.80, 1.01]    | 0.070                 | 1.13 [0.94, 1.35]    | 0.191                 |
|                        | NHB      | 1.70 [0.74, 3.90]    | 0.83 [0.65, 1.07]    | 0.153                 | 1.25 [0.49, 3.17]    | 0.640                 |
|                        | NHAPI    | 1.01 [0.55, 1.86]    | 0.60 [0.28, 1.28]    | 0.189                 | 1.62 [0.71, 3.70]    | 0.255                 |
| <b>All stages</b>      |          |                      |                      |                       |                      |                       |
|                        | Hispanic | 1.01 [0.72, 1.42]    | 1.25 [0.83, 1.89]    | 0.286                 | 1.21 [0.78, 1.88]    | 0.401                 |
|                        | NHB      | 1.35 [0.95, 1.92]    | 1.70 [0.61, 4.75]    | 0.312                 | 1.26 [0.27, 5.91]    | 0.773                 |
|                        | NHAPI    | 1.37 [1.02, 1.84]    | 1.30 [0.24, 7.12]    | 0.765                 | 1.27 [0.35, 4.63]    | 0.717                 |
|                        | NHAIAN   | 1.53 [0.38, 6.14]    | 2.05 [0.04, 98.83]   | 0.716                 | 1.90 [0.02, 210.9]   | 0.790                 |
|                        | Race     | aHR [95% CI] for MSS | aHR [95% CI] for MSS | <i>P</i> -interaction | aHR [95% CI] for MSS | <i>P</i> -interaction |
| <b>Localized stage</b> |          |                      |                      |                       |                      |                       |
|                        | Hispanic | 0.66 [0.31, 1.40]    | 1.28 [0.93, 1.75]    | 0.126                 | 1.09 [0.93, 1.27]    | 0.303                 |
|                        | NHB      | 2.00 [0.93, 4.28]    | 2.95 [0.24, 36.89]   | 0.401                 | 1.52 [0.27, 8.39]    | 0.632                 |
|                        | NHAPI    | 1.22 [0.69, 2.17]    | 0.83 [0.56, 1.22]    | 0.336                 | 1.26 [0.001, 1299.3] | 0.947                 |
|                        | NHAIAN   | 9.60 [1.31, 70.19]   | 0.62 [0.38, 1.01]    | 0.056                 | 1.29 [0.90, 1.83]    | 0.161                 |
| <b>All stages</b>      |          |                      |                      |                       |                      |                       |
|                        | Hispanic | 1.08 [0.76, 1.52]    | 1.14 [0.42, 3.03]    | 0.801                 | 1.18 [0.53, 2.61]    | 0.687                 |
|                        | NHB      | 1.03 [0.72, 1.46]    | 1.30 [0.79, 2.14]    | 0.301                 | 1.37 [0.78, 2.40]    | 0.271                 |
|                        | NHAPI    | 1.05 [0.78, 1.41]    | 1.03 [0.51, 2.07]    | 0.932                 | 1.17 [0.64, 2.14]    | 0.612                 |
|                        | NHAIAN   | 0.65 [0.16, 2.63]    | 1.63 [0.70, 3.77]    | 0.257                 | 1.13 [0.79, 1.61]    | 0.494                 |

34 \*For each of the models (localized stage, regional stage, distant stage, and all stages) for mucosal melanoma only,  
 35 the HRs for MSS and *P* values were calculated from Cox proportional hazard models with race, year of diagnosis  
 36 and the interaction terms. The aHRs for MSS and *P* values were calculated from Cox proportional hazard models  
 37 with race, year of diagnosis and the interaction terms, adjusting for age, gender, histological subtype and stage. *P*  
 38 values in 2000-2009 showed the significance comparing the HRs/aHRs to NHW for melanomas diagnosed in 2000-  
 39 2009 and those for melanomas diagnosed <2000. *P* values in ≥2010 showed the significance comparing the  
 40 HRs/aHRs to NHW for melanomas diagnosed in ≥2010 and those for melanomas diagnosed before 2000.  
 41 SEER=Surveillance, Epidemiology, and End Results; HR=hazard ratio; CI=confidence interval. NHW=non-  
 42 Hispanic white; NHB=non-Hispanic black; NHAPI=non-Hispanic Asian or Pacific Islander; NHAIAN=non-  
 43 Hispanic American Indian/Alaska Native.

44 **Supplemental Table 3.** Hazard ratio (HR) (top) and adjusted hazard ratio (aHR) (bottom) and  
 45 95% CIs for MSS of different racial/ethnicity groups compared to NHW in the SEER cohort and  
 46 across three diagnostic year periods for different stages – uveal melanoma only (n=12374,  
 47 NHAIAN excluded due to too low count)

|                        |          | <2000                | 2000-2009            |               | ≥2010                |               |
|------------------------|----------|----------------------|----------------------|---------------|----------------------|---------------|
|                        | Race     | HR [95% CI] for MSS  | HR [95% CI] for MSS  | P-interaction | HR [95% CI] for MSS  | P-interaction |
| <b>Localized stage</b> |          |                      |                      |               |                      |               |
|                        | Hispanic | 1.19 [0.83, 1.73]    | 1.17 [0.03, 40.24]   | 0.931         | 1.08 [0.67, 1.73]    | 0.752         |
|                        | NHB      | 1.16 [0.60, 2.24]    | 0.97 [0.80, 1.18]    | 0.767         | 0.76 [0.28, 2.06]    | 0.594         |
|                        | NHAPI    | 0.42 [0.10, 1.67]    | 0.82 [0.52, 1.30]    | 0.397         | 0.90 [0.71, 1.15]    | 0.398         |
| <b>All stages</b>      |          |                      |                      |               |                      |               |
|                        | Hispanic | 1.07 [0.77, 1.48]    | 1.23 [0.67, 2.24]    | 0.502         | 1.17 [0.48, 2.86]    | 0.729         |
|                        | NHB      | 1.20 [0.69, 2.07]    | 1.35 [0.17, 10.92]   | 0.780         | 0.84 [0.45, 1.56]    | 0.583         |
|                        | NHAPI    | 0.96 [0.45, 2.01]    | 1.06 [0.63, 1.78]    | 0.824         | 1.29 [0.53, 3.17]    | 0.577         |
|                        | Race     | aHR [95% CI] for MSS | aHR [95% CI] for MSS | P-interaction | aHR [95% CI] for MSS | P-interaction |
| <b>All stages</b>      |          |                      |                      |               |                      |               |
|                        | Hispanic | 1.22 [0.88, 1.68]    | 1.36 [0.44, 4.17]    | 0.591         | 1.24 [0.01, 266.8]   | 0.937         |
|                        | NHB      | 1.16 [0.67, 2.01]    | 1.42 [0.33, 6.11]    | 0.636         | 0.92 [0.58, 1.45]    | 0.710         |
|                        | NHAPI    | 1.25 [0.59, 2.63]    | 0.77 [0.47, 1.26]    | 0.298         | 1.46 [0.11, 19.17]   | 0.773         |

48 \*For each of the models (localized stage and all stages) for uveal melanoma only, the HRs for MSS and P values  
 49 were calculated from Cox proportional hazard models with race, year of diagnosis and the interaction terms. The  
 50 aHRs for MSS and P values were calculated from Cox proportional hazard models with race, year of diagnosis and  
 51 the interaction terms, adjusting for age, gender and histological subtype. P values in 2000-2009 showed the  
 52 significance comparing the HRs/aHRs to NHW for melanomas diagnosed in 2000-2009 and those for melanomas  
 53 diagnosed <2000. P values in ≥2010 showed the significance comparing the HRs/aHRs to NHW for melanomas  
 54 diagnosed in ≥2010 and those for melanomas diagnosed before 2000.  
 55 SEER=Surveillance, Epidemiology, and End Results; HR=hazard ratio; CI=confidence interval. NHW=non-  
 56 Hispanic white; NHB=non-Hispanic black; NHAPI=non-Hispanic Asian or Pacific Islander; NHAIAN=non-  
 57 Hispanic American Indian/Alaska Native.

58  
 59  
 60  
 61  
 62  
 63  
 64  
 65  
 66  
 67  
 68  
 69  
 70  
 71  
 72  
 73

74 **Supplemental Table 4.** Adjusted hazard ratio (aHR) and 95% CIs for MSS of different  
 75 racial/ethnicity groups compared to NHW in the SEER cohort and across three diagnostic year  
 76 periods for different stages – age  $\geq 65$  only (n=162,456)

|                        |          | <2000                   | 2000-2009               |                       | $\geq 2010$             |                       |
|------------------------|----------|-------------------------|-------------------------|-----------------------|-------------------------|-----------------------|
|                        | Race     | aHR [95% CI]<br>for MSS | aHR [95% CI] for<br>MSS | <i>P</i> -interaction | aHR [95% CI]<br>for MSS | <i>P</i> -interaction |
| <b>Localized stage</b> |          |                         |                         |                       |                         |                       |
|                        | Hispanic | 0.94 [0.68, 1.29]       | 1.54 [1.11, 2.14]       | 0.009                 | 1.49 [1.01, 2.22]       | 0.046                 |
|                        | NHB      | 1.28 [0.81, 2.02]       | 1.54 [0.37, 6.42]       | 0.554                 | 4.19 [1.91, 9.19]       | <0.001                |
|                        | NHAPI    | 1.26 [0.78, 2.04]       | 1.36 [0.1, 17.73]       | 0.813                 | 1.24 [0, 17225.3]       | 0.965                 |
|                        | NHAIAN   | 0.99 [0.32, 3.08]       | 1.14 [0.28, 4.70]       | 0.855                 | 1.85 [0.38, 8.99]       | 0.447                 |
| <b>Regional stage</b>  |          |                         |                         |                       |                         |                       |
|                        | Hispanic | 1.11 [0.80, 1.53]       | 1.45 [0.86, 2.45]       | 0.159                 | 1.76 [1.06, 2.94]       | 0.029                 |
|                        | NHB      | 1.39 [0.93, 2.08]       | 1.53 [0.15, 15.3]       | 0.719                 | 1.71 [0.31, 9.30]       | 0.537                 |
|                        | NHAPI    | 1.57 [1.06, 2.30]       | 1.31 [0.61, 2.81]       | 0.483                 | 1.48 [0.02, 143.3]      | 0.866                 |
|                        | NHAIAN   | 2.82 [1.17, 6.80]       | 1.65 [0.57, 4.79]       | 0.353                 | 1.96 [0.17, 22.74]      | 0.590                 |
| <b>Distant stage</b>   |          |                         |                         |                       |                         |                       |
|                        | Hispanic | 1.22 [0.82, 1.81]       | 0.92 [0.80, 1.06]       | 0.253                 | 1.24 [0.005, 318.2]     | 0.940                 |
|                        | NHB      | 1.55 [1.03, 2.33]       | 0.81 [0.68, 0.97]       | 0.022                 | 1.21 [0.74, 2.00]       | 0.444                 |
|                        | NHAPI    | 1.31 [0.85, 2.03]       | 1.16 [0.58, 2.33]       | 0.676                 | 1.68 [0.48, 5.89]       | 0.418                 |
| <b>All stages</b>      |          |                         |                         |                       |                         |                       |
|                        | Hispanic | 1.03 [0.85, 1.24]       | 1.38 [1.08, 1.75]       | 0.009                 | 1.62 [1.26, 2.08]       | <0.001                |
|                        | NHB      | 1.37 [1.08, 1.73]       | 1.23 [0.65, 2.35]       | 0.521                 | 2.14 [1.17, 3.90]       | 0.013                 |
|                        | NHAPI    | 1.52 [1.22, 1.91]       | 1.31 [0.77, 2.21]       | 0.317                 | 1.78 [0.47, 6.75]       | 0.397                 |
|                        | NHAIAN   | 1.39 [0.79, 2.45]       | 1.69 [0.23, 12.68]      | 0.608                 | 1.43 [0, 29727.1]       | 0.943                 |

77 \*For each of the four models (localized stage, regional stage, distant stage, and all stages), the adjusted HRs for  
 78 MSS and *P* values were calculated from Cox proportional hazard models with race, year of diagnosis and the  
 79 interaction terms, adjusting for age ( $\geq 65$ ), gender, primary site, histological subtype and stage. *P* values in 2000-  
 80 2009 showed the significance comparing the adjusted HRs to NHW for melanomas diagnosed in 2000-2009 and  
 81 those for melanomas diagnosed <2000. *P* values in  $\geq 2010$  showed the significance comparing the adjusted HRs to  
 82 NHW for melanomas diagnosed in  $\geq 2010$  and those for melanomas diagnosed before 2000.  
 83 SEER=Surveillance, Epidemiology, and End Results; HR=hazard ratio; CI=confidence interval. NHW=non-  
 84 Hispanic white; NHB=non-Hispanic black; NHAPI=non-Hispanic Asian or Pacific Islander; NHAIAN=non-  
 85 Hispanic American Indian/Alaska Native.
